# Transfer learning from simulations improves the classification of OCT images of glandular epithelia

Sassan Ostvar<sup>1</sup>, Han Truong<sup>1</sup>, Elisabeth R. Silver<sup>1</sup>, Charles J. Lightdale<sup>1,3</sup>, Chin Hur<sup>1,3,4</sup>, Nicholas P. Tatonetti<sup>1,2,4,\*</sup>

October 26, 2020

## Abstract

Esophageal adenocarcinoma (EAC) is a rare but lethal cancer with rising incidence in several global hotspots including the United States. The five-year survival rate for patients diagnosed with advanced disease can be as low as 5% in EAC, making early detection and preventive intervention crucial. The current standard of care for EAC targets patients with Barrett's esophagus (BE), the main precursor to EAC and a relatively common condition in adults with chronic acid reflux disease. Preventive care for EAC requires repeated surveillance endoscopies of BE patients with biopsy sampling, and can be intrusive, error-prone, and costly. The integration of minimally-invasive subsurface tissue imaging in the current standard of care can reduce the need for exhaustive tissue sampling and improve the quality of life in BE patients. Effective adoption of subsurface imaging in EAC care can be facilitated by computer-aided detection (CAD) systems based on deep learning. Despite their recent successes in lung and breast cancer imaging, the development of deep neural networks for rare conditions like EAC remains challenging due to data scarcity, heavy bias in existing datasets toward non-cases, and uncertainty in image labels. Here we explore the use of synthetic datasets—specifically data derived from simulations of optical back-scattering during imaging—in the development of CAD systems based on deep learning. As a proof of concept, we studied the binary classification of esophageal OCT into normal squamous and glandular mucosae, typical of BE. We found that deep convolutional networks trained on synthetic data had improved performance over models trained on clinical datasets with uncertain labels. Model performance also improved with dataset size during training on synthetic data. Our findings demonstrate the utility of transfer from simulations to real data in the context of medical imaging, especially in the severely data-poor regime and when significant uncertainty in labels are present, and motivate further development of transfer learning from simulations to aid the development of CAD for rare malignancies.

## Index Terms

computer-aided detection; cancer imaging; transfer learning; simulation; deep learning.

## I. INTRODUCTION

Esophageal adenocarcinoma (EAC), a cancer of the distal esophagus, is a public health concern in several countries including the United States due to its quickly rising incidence and poor prognosis. The current 5-year survival rate for EAC is ~20% in the US and drops to <5% for patients diagnosed with late-stage disease, calling to attention the need for improved preventive screening of at-risk patients [1]. Population surveillance for EAC targets Barrett's esophagus (BE), or pre-malignant intestinal metaplasia of the distal esophageal mucosa. BE affects an estimated 2-5% of the US adult population [2], a small fraction of whom develop cancer. Preventive screening for EAC is achieved by repeated surveillance endoscopies that rely on a combination of visual examination, mucosal biopsies, and endomicroscopy [1], [3]. Despite efforts to optimize EAC surveillance for early detection, malignant progressions in BE (i.e. dysplasia) remain difficult to detect with existing practices, and a balance between diagnostic yield, cost-effectiveness, and intrusiveness of screening is yet to be reached. Advanced imaging modalities like optical coherence tomography (OCT) are emerging technologies that may improve the accuracy and reduce the intrusiveness of the standard of care in endoscopic EAC surveillance [4], [5]. Subsurface tissue imaging with OCT provides rich depth-resolved structural information on the entire distal esophagus. However, the difficulty associated

<sup>1</sup>Department of Medicine, Columbia University Irving Medical Center, New York, USA

<sup>2</sup>Department of Biomedical Informatics, Columbia University, New York, USA

<sup>3</sup>Division of Digestive and Liver Diseases, Columbia University Irving Medical Center, New York, USA

<sup>4</sup>Herbert Irving Comprehensive Cancer Research Center, Columbia University Irving Medical Center, New York, USA

\*corresponding author: npt2105@cumc.columbia.edu

41 with interpreting this data under time constraints is a barrier to its effective integration with existing procedures,  
42 especially by non-expert endoscopists outside specialized care centers.

43 Deep learning (DL) for computer-aided detection (CAD) has recently led to breakthroughs for similar surveillance  
44 targets in screening mammography for breast cancer [6], low-dose chest CT for lung cancer [7], and OCT-based  
45 diagnostics in ophthalmology [8], [9], often achieving similar performance to human raters [10]. Artificial intelligence  
46 (AI) systems for CAD can improve cancer diagnostics by increasing the accuracy of image-based early detection,  
47 reducing the required human workload in surveillance programs, and minimizing the morbidity of preventive  
48 interventions [6]. Advances in early detection can directly impact patient outcomes and improve the effectiveness  
49 and cost-effectiveness of population surveillance. The potential benefits are similarly multi-fold to the standard  
50 of care for BE, where the likelihood of missed malignancies, over-screening, and propensity for risk-averse but  
51 aggressive interventions like complete eradication of the affected esophageal mucosa are currently problematic.  
52 Similar to many other examples in medical imaging, the application of DL to OCT imaging of the esophagus for  
53 cancer surveillance is limited by data scarcity—that is, the difficulty of curating sizable datasets with reliable and  
54 balanced labels [11].

55 Transfer learning (i.e. the use of pre-trained model architectures to develop image classifiers [12]), has recently been  
56 adopted to overcome data scarcity limitations in medical imaging for applications in radiology [13], ophthalmology  
57 [14], and brain imaging [15], [16]. The accessibility of computer vision benchmarking datasets such as ImageNet  
58 have made them a popular choice for pre-training, but it is not clear if transfer from natural to medical datasets  
59 is optimal in deep convolutional architectures [17]. Medical imaging datasets are generated by measurements for  
60 specific materials over precisely-selected bands of the electromagnetic spectrum and under controlled experimental  
61 conditions. Benchmarking datasets instead tend to span many scales, materials, light sources, and devices, and  
62 cluster around the visible spectrum. Another point of divergence is the existence of thousands versus a handful of  
63 labels in the classification problems defined for the two types of data.

64 Here, we make an argument in favor of fine-tuning DL models on synthetic datasets derived from simulations of  
65 the imaging process. Such a dataset can be constructed based on knowledge of tissue composition and structure  
66 in cases and controls, subsurface light scattering, and the process of signal construction in an imaging method of  
67 interest. We explore this idea using an esophagus OCT dataset collected at the Columbia University Irving Medical  
68 Center between 2014 to 2018. We focus on BE as the first structural transition along the EAC pathway, where the  
69 stratified epithelium of the healthy esophagus is replaced with a glandular epithelium that mimics the gastric and  
70 intestinal morphologies. Microscopic examination of this lesion reveals a complete restructuring of the affected  
71 tissue into a glandular mucosa, resulting in a loss of clear lamination between the epithelium and the stroma, which  
72 is reflected in the OCT signal [5].

73 We frame our analysis as binary classification of OCT images into metaplastic and normal segments using instances  
74 of the ResNet-18 architecture starting with ImageNet weights. Model performance was evaluated after fine-tuning on  
75 (i) synthetic data and (ii) clinical data with noisy annotations inferred from electronic health records (no retrospective  
76 expert annotations). Both models were evaluated using an external validation set with retrospective expert annotations.  
77 Fine-tuning on the synthetic dataset led to significant improvement in performance above chance. In comparison,  
78 fine-tuning on the clinical dataset with noisy annotations led to marginal improvement over chance. We discuss these  
79 results in the context of automatic segmentation of esophagus OCT into normal and metaplastic regions. Finally, the  
80 prospects for improving the proposed pipeline by increasing the fidelity of physics-based data synthesis are briefly  
81 discussed as a template for future work. We argue that transfer learning from simulations enables the integration of  
82 knowledge of disease from disparate sources, modalities, and scales, and improve model development for CAD in  
83 data-poor settings.

84

## II. METHODS

### 85 A. Clinical dataset

86 1) *Patients:* We identified a retrospective cross-sectional cohort of patients with both (i) confirmed diagnosis of BE,  
87 and (ii) at least one upper endoscopy encounter with OCT imaging at the Columbia University Irving Medical

88 Center (CUIMC). For each patient we retrieved volumetric OCT scans of the distal esophagus and the associated  
89 hospital electronic health records (EHR), including diagnoses and treatment histories, gastrointestinal endoscopy  
90 reports, and the pathology reports describing biospecimens that were collected and analyzed during the course  
91 of surveillance and treatment. We carried out all data curation and management according to the rules set by a  
92 CUIMC Institutional Review Board to ensure the privacy of human subjects and fair use of data.

93

94 2) *OCT scans*: We obtained 3D OCT scans and associated DICOM metadata for each encounter directly from a  
95 swept-source instrument (NvisionVLE® Imaging System, NinePoint Medical, Bedford, MA) in collaboration with  
96 the Division of Digestive and Liver Diseases at CUIMC. We identified three types of scans: *full scans*, which  
97 covered the entire tissue segment without manual guidance, and *manual scans*, which covered areas of interest to  
98 the endoscopist, and preparatory ‘scout’ scans. Each volumetric scan typically resolved part of the stomach or a  
99 hiatal hernia below the GE junction, to an extent that varied case by case. Full scans contained 1200 cross-sectional  
100 B-scans (hereafter ‘frames’), and the stack height varied for manual scans. Each frame was a  $2048 \times 4096$  image  
101 recorded in 8-bit grayscale. We analyzed the resulting dataset on the basis of subdivisions of frames as described  
102 below. The instrument employed balloon catheters to dilate and immobilize the esophageal wall during image  
103 acquisition. The balloon diameters and operative pressures showed variation over the period of data acquisition (Fig.  
104 3, Supplementary Information). In each frame, the balloon cross-section was discernible as a line of bright pixel  
105 intensity marking the boundary between the tissue surface and the esophageal lumen. The balloon catheter also  
106 provided a (longitudinal) registration watermark that served as the reference for the measurement of circumferential  
107 positions. We normalized all  $2048 \times 4096$  frames prior to the analysis to flatten the epithelial surface and remove  
108 the (dark) lumen using the balloon cross-section pixel intensity as the threshold.

109

110 3) *Annotations derived from EHR*: We thoroughly examined the pathology reports with readings describing  
111 biospecimens to deduce a set of corresponding labels and sampling locations for each tissue sample. To generate  
112 the final labels, we successively reduced an exhaustive dictionary of terms that had been used in the reports to  
113 describe the biospecimens (Table II, Supplementary Information). This process resulted in four primary clinical  
114 phenotypes of interest: NORMAL indicated an absence of evidence supporting a diagnosis of intestinal metaplasia,  
115 dysplasia, or cancer (i.e. the stratified epithelium was preserved). METAPLASIA indicated endoscopic and pathology  
116 findings supporting a diagnosis of Barrett’s metaplasia. DYSPLASIA indicated pathology findings indicating disease  
117 progression in the form of glandular dysplasia. CANCER indicated observations of malignant neoplasia of any  
118 clinical stage, including intramucosal carcinomas, cancers with submucosal invasion, etc. Additionally, we marked  
119 stomach tissue samples under STOMACH and all other under OTHER. Tissue sampling locations had been reported  
120 in GI endoscopy reports as pairs of longitudinal (‘distance to incisors’) and angular (‘clock’) positions. We asked  
121 two raters to independently match the pathology readings with ROIs in the scans by first matching the entries in  
122 pathology reports with the pair of longitudinal and angular values provided in the GI endoscopy reports, and then  
123 converting the recordings to approximate regions of interest (ROIs) in the scan’s coordinate system. For a subset of  
124 patients, a laser marking device had been used to mark the precise location of the tissue sample, enabling improved  
125 matching of records with ROIs.

126

127 4) *External validation set*: We evaluated the performance of image classifiers using an independently annotated set  
128 of frames that was prepared retrospectively in collaboration with an expert gastroenterologist and frequent user of  
129 the OCT instrument (CJL). To generate this set, we asked the rater to assign annotations and a confidence score  
130 between 50-100% to the regions within a set of pre-selected frames that were suspected for METAPLASIA (cases)  
131 or NORMAL (controls). We then subdivided this set of annotated frames into patches of  $128 \times 256$  pixels and used  
132 them as the primary benchmark for model performance evaluation.

### 133 B. Image classification with deep convolutional networks

134 We performed image classification experiments on  $128 \times 256$  8-bit grayscale patches using instances of the ResNet-18  
135 architecture starting with ImageNet weights [18]. We evaluated all model instances after 40 epochs of training with  
136 a learning rate of  $3 \times 10^{-6}$ , learning rate decay over 7 epochs of 0.5, and batch size of 600, and repeated each run  
137 with 100 model instances that were identical except in the last fully connected layer, which we initialized randomly

138 for each run. In our main analysis, we compared model performance after training on two independent datasets: (i)  
 139 subsets of the clinical dataset with annotations deduced from pathology reports, and (ii) a synthetic dataset derived  
 140 from simulations, both prepared using a 70/30 training/testing split. We measured model performance using the area  
 141 under the curve of the receiver operating characteristic curve (ROC AUC). In this study, we report the results of  
 142 binary supervised classification of patches into METAPLASIA (cases) or NORMAL (controls).

143 *C. Synthetic data*

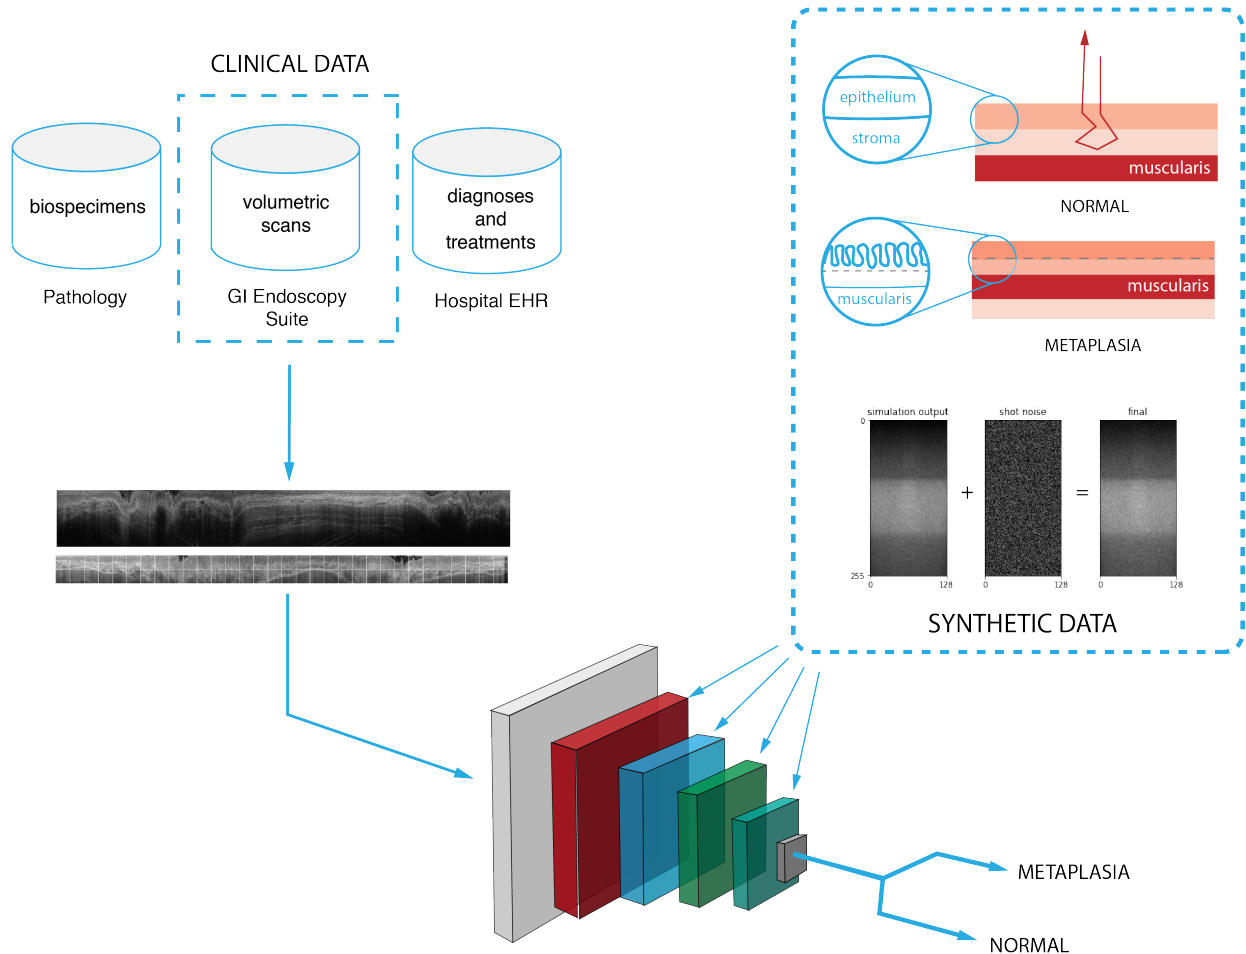

Fig. 1. **Overview of the model development pipeline:** Instances of ResNet-18 with ImageNet weights are trained on synthetic data derived from simulations of light scattering in model tissue geometries. The resulting model is used to classify clinical OCT data into patches indicating either a normal squamous epithelium (NORMAL) or Barrett's esophagus (METAPLASIA).

144 Subsurface imaging for EAC surveillance targets the esophageal mucosa (EM). The EM is a multilayered structure  
 145 consisting of a stratified epithelium, stroma, and a muscularis layer. A clear stratification between the epithelium and  
 146 stroma is present in NORMAL and partially lost in METAPLASIA. In the following, we outline a set of simulation  
 147 experiments conducted to approximate patches of NORMAL and METAPLASIA in our dataset on basis of this  
 148 structural difference using simple multilayered representations of the EM. Clinical OCT frames are constructed out  
 149 of groups of adjacent axial optical reflectivity profiles (A-lines). Each OCT frame encodes structural information  
 150 as variations in optical reflectivity in the axial and transverse directions. Simulation of OCT data can therefore  
 151 be broadly considered as the problem of computing a series of A-lines for given spatial distributions of tissue  
 152 constituents. Simulation of OCT A-lines is the focus of computational optical imaging (COI), a research program  
 153 dedicated to the simulation of light scattering in biological tissue and signal localization in imaging instruments  
 154 based on first principles or approximate sampling methods as described in the following (e.g. [19], [20]).

156 1) *OCT data structure and artifacts*: Each OCT scan of the lower esophagus is an  $n_r \times n_\theta \times n_z$  matrix  
 157  $\mathbf{R} = R_{ijk}$  of voxel intensities that discretizes the annulus bound by  $r_0 \leq r \leq r_0 + n_r \Delta \ell_r$  and  $0 \leq z \leq n_z \Delta \ell_z$   
 158 with voxel resolutions  $\Delta \ell_{\text{voxel}} = (\Delta \ell_r, \Delta \ell_\theta, \Delta \ell_z)$ , where  $r_0$  is the radius of the inflated balloon catheter. A  
 159 volumetric scan is interpreted as a stack of  $n_z$  frames (or B-scans)  $\mathbf{R}_k = R_{ij,k}$ , which are in turn composites  
 160 of  $n_\theta$  axial reflectivity profiles (A-lines)  $\mathbf{R}_{kj} = R_{kj,i}$ . The instrument records  $\mathbf{R}$  one A-line at a time during  
 161 a helical pull-back of the endoscopic probe with two degrees of freedom that control the longitudinal ( $\Delta \ell_z$ )  
 162 and transverse ( $\Delta \ell_\theta$ ) voxel resolutions, and the coherent length of the light source sets the axial resolution  
 163 ( $\Delta \ell_r$ ). We assume that  $n_r$ ,  $n_\theta$ , and  $n_z$  are constant across experiments. Ideally, the instrument's light source  
 164 and fiber optic probe coincide with the centroid of the catheter's cross-section during image acquisition, but a  
 165 persistent offset is often present in practice, which may affect the total imaging depth. Each frame is susceptible to  
 166 motion artifacts due to in-plane displacements of the endoscopic probe at fixed  $z$ . The final image also carries  
 167 shot noise that is introduced as the signal is transmitted through the fiber optic probe and the optical detector's circuitry.

168  
 169 2) *Simulated optical back-scattering*: To estimate the A-lines, we adopted a mesh-based Monte Carlo (MC)  
 170 algorithm to simulate subsurface scattering in model tissue geometries with predefined optical properties [21]–[23].  
 171 The MC method provides an estimate of the spatial distribution of the energy of back-scattered radiation via  
 172 sampling a set of possible trajectories of individual ‘photon packets’ as they interact with mesh elements. Photons are  
 173 launched from a source and collected by a probe that employs a threshold on the incidence angle of back-scattered  
 174 packets. Each recorded packet is specified by an optical depth  $\ell_n$  (eqv. to one half the optical path length) and a  
 175 dimensionless measure of energy,  $w_n$  (weight). Packet trajectories are determined by three types of mesh-photon  
 176 interactions: (i) specular (Fresnel) reflection at the mesh surface, (ii) partial loss of energy proportional to a  
 177 local adsorption coefficient,  $\mu_a$ , and (iii) scattering. The former is calculated from the differences in the real part  
 178 of the refractive index  $n$  [20]. The latter is specified by the scattering coefficient,  $\mu_s$ , and a scattering phase  
 179 function,  $p(s' \rightarrow s) = p(\theta, \varphi)$ , i.e. the probability density of scattering into a direction  $s$  given current direction  $s'$ ,  
 180 parametrized over the polar and azimuthal scattering angles  $\theta$  and  $\varphi$  at the site of scatter. In biomedical optics, the  
 181 dependence of  $p(\theta, \varphi)$  on  $\varphi$  and  $\theta$  are typically approximated by the continuous uniform and the Henyey-Greenstein  
 182 (HG) probability density functions, respectively [24]. The HG function is adjusted by a single variable,  $-1 \leq g \leq 1$ ,  
 183 i.e. the local anisotropy, where -1 and +1 specify dominant backscattering and forward scattering, respectively.

184  
 185 3) *Signal localization*: Part of the back-scattered radiation that is incident on the instrument's fiber optic probe is  
 186 collected and converted into an electric current by an optical detector, from which A-lines are derived. Considering  
 187 transport in a coordinate system where tissue depth is parameterized by  $r$ , this process can be simulated using an  
 188 indicator function  $I(r, n)$  that enforces the probe's radial and angular thresholds on the  $n$ -th back-reflected packet,  
 189 and discretizes the axial span with a resolution set by the coherence length  $\ell_c$  of the light source [22]:

$$I(r, n) = \begin{cases} \ell_c, & \ell_c < \|\Delta s_n - 2r_{max}\|, d_n < d_{max}, \theta_{z,n} < \theta_{max}, \|\Delta s_n - 2r\| < \ell_c \\ 0, & \text{otherwise,} \end{cases} \quad (1)$$

190 where  $d_{max}$  and  $\theta_{max}$  are the positional and angular thresholds of the probe. In Eq-1,  $d_n$  is measures the distance  
 191 between the probe and a reflected packet,  $\Delta s_n = 2\ell_n$  measures the optical path of the  $n$ -th back-reflected packet,  
 192  $\theta_{z,n}$  is the angle of the packet's trajectory with respect to the  $r$ -axis of the lab reference frame, and  $r_{max}$  is the  
 193 maximum depth reached by the photon packet. The depth-resolved reflectance is then calculated as

$$R(r) = \frac{1}{N} \sum_{n=1}^N I(z, n) \mathcal{L}_n w_n, \quad (2)$$

194 The correction factor  $\mathcal{L}_n$  is a likelihood ratio that compensates for biased scattering in the calculation of  $\ell_n$  and  $w_n$ .  
 195 We introduced biased scattering artificially as discussed in [22], [24], [25] to speed up the calculation of  $R$ , since  
 196 most tissue materials have anisotropies close to unity (i.e. dominantly forward scattering), requiring a prohibitively  
 197 large number of packets to be simulated in order to generate a reliable signal. The signal associated with Eqs 1 and

TABLE I  
SUMMARY STATISTICS OF THE CUIMC PATIENT COHORT AND ASSOCIATED OCT AND PATHOLOGY DATASETS.

| Variable                             | Values         |
|--------------------------------------|----------------|
| Data period                          | 2014-2018      |
| Number of patients                   | 189            |
| Age                                  | 70.0 $\pm$ 9.4 |
| Sex (% male)                         | 130/188 (69.2) |
| High-grade dysplasia (%)             | 83/189 (43.9)  |
| Malignant neoplasia (%)              | 24/189 (12.7)  |
| Family history of GI cancers         | 19/189 (10.1)  |
| Reflux esophagitis                   | 49/189 (25.9)  |
| Atrophic gastritis                   | 31/189 (16.4)  |
| Hiatal hernia (%)                    | 127/189 (67.2) |
| Duodenitis (%)                       | 11/189 (5.8)   |
| Number of OCT scans                  | 508            |
| Full scans (%)                       | 299/508 (58.9) |
| Manual scans (%)                     | 147/508 (28.9) |
| Scout (test) scans (%)               | 62/508 (12.2)  |
| Number of biospecimens               | 552            |
| Biopsies (%)                         | 527/552 (95.5) |
| Endoscopic mucosal resection (%)     | 12/552 (2.2)   |
| Endoscopic submucosal dissection (%) | 7/552 (1.3)    |
| Number of laser markings             | 118            |

2 is an estimate of the back-reflected power distribution along the tissue depth, contributed by multiply scattered packets. A similar procedure gives the contribution of ballistic and semi-ballistic back-reflection events [22].

4) *Tissue structure*: We treated the esophageal tissue as a composite of epithelial, stromal, and muscularis layers. The optical properties of each layer are specified as four scalar fields,  $n = n(r, \theta, z)$ ,  $\mu_a = \mu_a(r, \theta, z)$ ,  $\mu_s = \mu_s(r, \theta, z)$ , and  $g = g(r, \theta, z)$ , which are discretized using a tetrahedral mesh. In the simplest approximation, we can study the esophageal cross-section in the limit of vanishing displacement from a perfectly dilated reference configuration (here idealized as a multilayered annulus). We neglect the curvature of the annulus over segments corresponding to  $128 \times 256$  patches and assume material homogeneity in each layer. The choice of numeric values for  $\mu_s$ ,  $\mu_a$ ,  $g$ , and  $n$  is guided by published experimental work on the optical properties of gut mucosa over the spectral window of the OCT instrument (1250–1350 nm) [26]–[29].

#### D. Simulations

We implemented all classifiers in PyTorch and trained all models using a local NVIDIA Tesla GPU cluster. We used TetGen [30] to generate 3D tetrahedral meshes and an open-source implementation of the Monte Carlo method in CUDA C [22] to perform the subsurface scattering simulations on an NVIDIA Quadro P6000 card. We implemented all pipelines in Jupyter notebooks.

### III. RESULTS

#### A. Patient population

Table I provides a summary of the CUIMC patient population and associated pathology and imaging data. Patients met the inclusions criteria if they had a diagnosis of BE and at least one OCT scan of the lower esophagus. We identified a total of 189 BE patients, among whom 43.9% had progressed to BE dysplasia and 12.7% to cancer during their health history. Hiatal hernias were present in 67.2% of the patients.

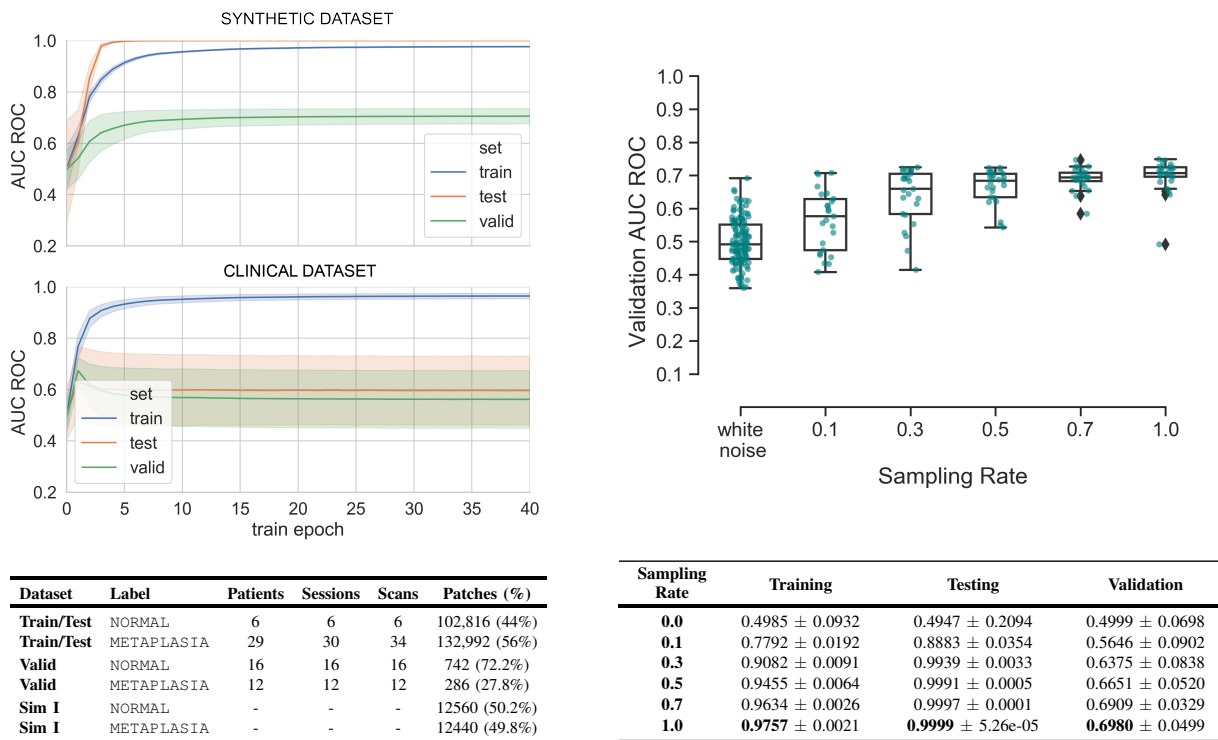

Fig. 2. **Model performance evaluation after fine-tuning on synthetic and clinical data** (A; top left) Classification performance of ResNet-18 with ImageNet weights over epochs of training on synthetic dataset I, and a clinical dataset with noisy annotations; (B; top right) Classification performance on the validation set as a function of the sampling rate of the synthetic dataset during model training; (C; bottom left) Overview of both training datasets and the validation set; (D; bottom right) Tabulated results corresponding to B.

## 220 B. Imaging dataset and annotations

221 We obtained a total of 508 scans, of which 299 were full scans, covering an invariant 6 cm of tissue that coincided  
 222 with the lower esophagus and gastric cardia. We excluded partial scans from the study. We assigned frame-by-frame  
 223 annotations to each scan based on the indications extracted from pathology reports and the approximate locations of  
 224 tissue samples in the corresponding scan as reported in the GI endoscopy reports. In deriving the annotations, we  
 225 extracted and analyzed an exhaustive dictionary of descriptive terms from pathology reports, and reduced them to a  
 226 small set of labels that indicated the extent of disease progression as described in the Supplementary Information  
 227 (Table II). Measurement of longitudinal and angular positions of tissue samples were based on readings from  
 228 the regular endoscopic probe. The large discrepancy in how precisely the regular endoscopic probe and the OCT  
 229 catheter measured distances limited precise assignment of readings from pathology reports to the corresponding  
 230 sampling locations in the scans. We therefore restricted the clinical training set to the subset of encounters in  
 231 which at least one biospecimen had been collected with the aid of laser markings (118 in total). We assigned the  
 232 corresponding annotation to the frames within a given distance from the laser marking (equal to typical dimensions of  
 233 biopsies obtained using large-capacity forceps, cold forceps, endoscopic mucosal resection, or endoscopic submucosal  
 234 dissection as indicated in the EHR). The resulting annotated ranges of frames constituted a training/testing dataset  
 235 of 128×256 patches (Fig. 2-C). Significant variation and bias toward controls was present in the pathology dataset  
 236 (Fig. 3, Supplementary Information).

## 237 C. Simulation of OCT B-scans

238 We designed the simulated as a set of 128×256 patches equally partitioned between the METAPLASIA and NORMAL  
 239 labels. We adopted an idealized model geometry with three distinct layers to simulate each label, and approximated  
 240 the scattering and adsorption coefficients and anisotropy of each layer based on the literature on optical imaging  
 241 of gut mucosa in the 1250-1350 nm range of source wavelengths. In setting these parameters, we assumed the  
 242 muscularis and stromal layers had the same optical properties in both labels, but the epithelial layer in METAPLASIA

243 had increased adsorption and scattering coefficients and decreased anisotropy compared with NORMAL. We then  
244 derived synthetic OCT A-lines from power distributions of back-scattered radiation using a mesh-based Monte Carlo  
245 light light scattering algorithm. The algorithm constructed image patches (i.e. subregions of OCT B-scans) one  
246 A-line at a time for 128 placements of the light source and probe over the model geometry and clipped to 256  
247 pixels in the axial direction. We augmented the resulting dataset by a factor of 10 by permuting a white noise  
248 floor in the range [15, 25] dB and re-scaling the total pixel intensity to [100, 200] dB, assuming a value of 255  
249 corresponded to the reflectance of the balloon catheter material.

#### 250 *D. Classification accuracy*

251 We first trained a set of ResNet-18 instances with ImageNet weights on a clinical dataset comprised, respectively, of  
252 102,816 and 132,992 patches of NORMAL and METAPLASIA. We evaluated the classification accuracy of this model  
253 on the external validation set and observed generally poor performance over 40 train epochs as illustrated in Fig.  
254 2-A. As a comparator, we trained an independent set of ResNet-18 instances on a synthetic dataset comprised of  $\sim$   
255 12,500 patches per label, also starting with ImageNet weights, and evaluated for classification accuracy using the  
256 validation set. Training on the synthetic dataset yielded a peak mean AUC ROC of  $\approx 0.7$  over 40 train epochs (Fig.  
257 2-A). We then repeated the experiments with synthetic data, this time varying the fraction of data used during model  
258 training between 0.0 and 1.0, using a dataset of white noise images as the negative control. Fig. 2-B illustrates the  
259 evolution in the mean and variance of the resulting AUC ROC as a function of the sampling rate, where mean  
260 performance shows a monotonous increase. Similarly, the variance in performance between different instances shows  
261 a decreasing trend.

262

## IV. DISCUSSION

263 CAD systems based on models of computer vision employing deep learning rely on sizable and precisely annotated  
264 clinical datasets. The curation of such datasets is laborious as it may require extensive retrospective expert evaluation.  
265 These datasets may be further limited in size, heavily biased toward cases or controls, and scattered across different  
266 institutions for clinical conditions of low population prevalence. In this work, we have reported the use of synthetic  
267 imaging data to boost the performance of a deep classifier of epithelial disease in one such data-poor setting. We  
268 found that fine-tuning a pre-trained deep convolutional architecture on synthetic data derived from simulations of  
269 light scattering provided a performance advantage to fine-tuning on a (larger) clinical dataset with noisy labels.  
270 To the best of our knowledge, this work is the first to demonstrate transfer from simulated to clinical data in the  
271 context of biomedical imaging.

272 In this study, the performance obtained from the model trained on clinical data was poorer than that obtained from  
273 the model trained on simulated data. We speculate that this discrepancy can be explained by persistent uncertainty  
274 in the labels of regions within a scanned volume. We have identified several contributing factors to this uncertainty,  
275 including limited spatial coverage of biopsy sampling, variation in biospecimen size, and imprecise measurement of  
276 longitudinal and angular positions corresponding to sampled regions within a scan. We expect the issues encountered  
277 here to be typical of similar datasets in other rare cancers and diseases. Transfer learning from simulations can be  
278 regarded as leveraging computation in a directed manner to address both (i) imprecise annotations, and (ii) imbalanced  
279 datasets, operating at a trade-off between fidelity and computational tractability. When scalable computations with  
280 properly motivated models are possible, they may reduce the burden of retrospective data surveys and enable the  
281 development of otherwise unreliable classifiers.

282 We can expand the simulations performed in this study in a number of ways. Accounting for residual stress  
283 and thickness inhomogeneities [31] and deformations induced by the balloon catheter [32], [33] can improve  
284 the modeling of tissue configuration during imaging. Simulations of wave scattering and signal localization in  
285 OCT can be based on first-principles calculations using Maxwell's equations, although this method is currently  
286 computationally prohibitive [19], [34], [35]. Explicitly accounting for light source geometry and signal localization  
287 in frequency-domain OCT in the Monte Carlo method may further improve the fidelity of the estimated OCT  
288 signal [36]. Efforts are currently underway to expand the implementation of the Monte Carlo to situations where  
289 significant spatial variation in the scattering phase function  $p(\theta, \varphi)$  is expected [37], as is the case in glandular  
290 mucosa. Finally, material inhomogeneities inside each tissue layer can be accounted for using models of epithelial



291 morphogenesis [38], although simultaneous resolution of deformations due to small-scale and tissue-scale stresses  
292 requires a multiscale treatment that is yet to be developed. The mesh-based Monte Carlo method facilitates the  
293 integration of biomechanical modeling in the existing data generation pipeline.

294 Among the priorities for future work is the resolution of inter-patient variability focusing on known biases in the  
295 target patient population. Candidates for BE surveillance present with tissue damage from long-term chronic reflux  
296 disease and epithelial alterations due to persistent esophagitis. Estimates of the optical properties in the control  
297 population may therefore require further adjustments for deviations from the healthy stratified squamous epithelium.  
298 Hiatal hernias were present in the majority of the patients in our cohort, requiring further examination of the  
299 differences between the esophageal and gastric mucosa, and those between the gastric and Barrett’s mucosa. To a  
300 first approximation, we aggregated all tissue states prior to the onset of glandular morphogenesis into one label  
301 in the present work. Similarly, we aggregated the states corresponding to glandular mucosae of the gastric and  
302 esophageal phenotypes. We expect the expansion of the set of labels considered in the classification problem and  
303 inverse modeling of optical properties to inform data generation to improve the performance of our pipeline.

304

305

## V. CONCLUSIONS

306 Computational approaches to data augmentation represent a promising approach to overcoming data scarcity in the  
307 application of deep learning to diagnostic surveillance of rare conditions via tissue imaging. Physically-motivated  
308 computations that rely on clinical knowledge and mechanistic understanding of disease may provide an advantage  
309 over limited clinical datasets in data-poor settings. We demonstrated the utility of this approach for a proof-of-concept  
310 application to the classification of esophageal OCT.

311

## VI. ACKNOWLEDGEMENTS

312 We would like to thank Jianhua Lee, Brianna Lauren, Aaron Oh, and Lindsay Kumble for their help with the  
313 curation and review of EHR data, Zhong Wang of the Digital and Computational Pathology Laboratory at CUIMC  
314 for help with digitization of pathology slides, and Nicholas Giangreco for help with handling of OCT data. Fruitful  
315 conversations with NinePoint Medical (Bedford, MA) regarding the OCT data are appreciated. This work was  
316 supported by the National Institutes of Health via the grants U01 CA 199336 and R01 CA 247790. The authors  
317 declare no conflicts of interest.

318

## REFERENCES

- 319 [1] B. Qumseya, S. Sultan, P. Bain, L. Jamil, B. Jacobson, S. Anandasabapathy, D. Agrawal, J. L. Buxbaum, D. S. Fishman, S. R. Gurudu,  
320 *et al.*, “ASGE guideline on screening and surveillance of barrett’s esophagus,” *Gastrointestinal endoscopy*, vol. 90, no. 3, pp. 335–359,  
321 2019.
- 322 [2] T. J. Hayeck, C. Y. Kong, S. J. Spechler, G. S. Gazelle, and C. Hur, “The prevalence of barrett’s esophagus in the us: estimates from a  
323 simulation model confirmed by seer data,” *Diseases of the Esophagus*, vol. 23, no. 6, pp. 451–457, 2010.
- 324 [3] S. J. Spechler, P. Sharma, R. F. Souza, J. M. Inadomi, and N. J. Shaheen, “American gastroenterological association technical review on  
325 the management of barrett’s esophagus,” *Gastroenterology*, vol. 140, no. 3, pp. e18–e52, 2011.
- 326 [4] J. A. Evans, J. M. Poneros, B. E. Bouma, J. Bressner, E. F. Halpern, M. Shishkov, G. Y. Lauwers, M. Mino-Kenudson, N. S. Nishioka,  
327 and G. J. Tearney, “Optical coherence tomography to identify intramucosal carcinoma and high-grade dysplasia in barrett’s esophagus,”  
328 *Clinical Gastroenterology and Hepatology*, vol. 4, no. 1, pp. 38–43, 2006.
- 329 [5] M. Smith, B. Cash, V. Konda, A. Trindade, S. Gordon, S. DeMeester, V. Joshi, D. Diehl, E. Ganguly, H. Mashimo, *et al.*, “Volumetric  
330 laser endomicroscopy and its application to barrett’s esophagus: results from a 1,000 patient registry,” *Diseases of the Esophagus*,  
331 vol. 32, no. 9, p. doz029, 2019.
- 332 [6] S. M. McKinney, M. Sieniek, V. Godbole, J. Godwin, N. Antropova, H. Ashrafian, T. Back, M. Chesus, G. C. Corrado, A. Darzi, *et al.*,  
333 “International evaluation of an ai system for breast cancer screening,” *Nature*, vol. 577, no. 7788, pp. 89–94, 2020.
- 334 [7] D. Ardila, A. P. Kiraly, S. Bharadwaj, B. Choi, J. J. Reicher, L. Peng, D. Tse, M. Etemadi, W. Ye, G. Corrado, *et al.*, “End-to-end  
335 lung cancer screening with three-dimensional deep learning on low-dose chest computed tomography,” *Nature medicine*, vol. 25, no. 6,  
336 pp. 954–961, 2019.
- 337 [8] J. De Fauw, J. R. Ledsam, B. Romera-Paredes, S. Nikolov, N. Tomasev, S. Blackwell, H. Askham, X. Glorot, B. O’Donoghue, D. Visentin,  
338 *et al.*, “Clinically applicable deep learning for diagnosis and referral in retinal disease,” *Nature medicine*, vol. 24, no. 9, pp. 1342–1350,  
339 2018.

- 340 [9] D. S. Kermany, M. Goldbaum, W. Cai, C. C. Valentim, H. Liang, S. L. Baxter, A. McKeown, G. Yang, X. Wu, F. Yan, *et al.*, “Identifying  
341 medical diagnoses and treatable diseases by image-based deep learning,” *Cell*, vol. 172, no. 5, pp. 1122–1131, 2018.
- 342 [10] X. Liu, L. Faes, A. U. Kale, S. K. Wagner, D. J. Fu, A. Bruynseels, T. Mahendiran, G. Moraes, M. Shamdas, C. Kern, *et al.*, “A  
343 comparison of deep learning performance against health-care professionals in detecting diseases from medical imaging: a systematic  
344 review and meta-analysis,” *The lancet digital health*, vol. 1, no. 6, pp. e271–e297, 2019.
- 345 [11] A. Esteva, A. Robicquet, B. Ramsundar, V. Kuleshov, M. DePristo, K. Chou, C. Cui, G. Corrado, S. Thrun, and J. Dean, “A guide to  
346 deep learning in healthcare,” *Nature medicine*, vol. 25, no. 1, pp. 24–29, 2019.
- 347 [12] K. Weiss, T. M. Khoshgoftaar, and D. Wang, “A survey of transfer learning,” *Journal of Big data*, vol. 3, no. 1, p. 9, 2016.
- 348 [13] X. Wang, Y. Peng, L. Lu, Z. Lu, M. Bagheri, and R. M. Summers, “Chestx-ray8: Hospital-scale chest x-ray database and benchmarks  
349 on weakly-supervised classification and localization of common thorax diseases,” in *Proceedings of the IEEE conference on computer  
350 vision and pattern recognition*, pp. 2097–2106, 2017.
- 351 [14] M. D. Abràmoff, Y. Lou, A. Erginay, W. Clarida, R. Amelon, J. C. Folk, and M. Niemeijer, “Improved automated detection of diabetic  
352 retinopathy on a publicly available dataset through integration of deep learning,” *Investigative ophthalmology & visual science*, vol. 57,  
353 no. 13, pp. 5200–5206, 2016.
- 354 [15] Y. Ding, J. H. Sohn, M. G. Kawczynski, H. Trivedi, R. Harnish, N. W. Jenkins, D. Lituiev, T. P. Copeland, M. S. Aboian, C. Mari Aparici,  
355 *et al.*, “A deep learning model to predict a diagnosis of alzheimer disease by using 18f-fdg pet of the brain,” *Radiology*, vol. 290, no. 2,  
356 pp. 456–464, 2019.
- 357 [16] N. Burgos and O. Colliot, “Machine learning for classification and prediction of brain diseases: recent advances and upcoming challenges,”  
358 *Current Opinion in Neurology*, vol. 33, no. 4, pp. 439–450, 2020.
- 359 [17] M. Raghu, C. Zhang, J. Kleinberg, and S. Bengio, “Transfusion: Understanding transfer learning for medical imaging,” in *Advances in  
360 neural information processing systems*, pp. 3347–3357, 2019.
- 361 [18] K. He, X. Zhang, S. Ren, and J. Sun, “Deep residual learning for image recognition,” in *Proceedings of the IEEE conference on  
362 computer vision and pattern recognition*, pp. 770–778, 2016.
- 363 [19] P. R. Munro, “Three-dimensional full wave model of image formation in optical coherence tomography,” *Optics express*, vol. 24, no. 23,  
364 pp. 27016–27031, 2016.
- 365 [20] L. Wang, S. L. Jacques, and L. Zheng, “MCML—Monte carlo modeling of light transport in multi-layered tissues,” *Computer methods  
366 and programs in biomedicine*, vol. 47, no. 2, pp. 131–146, 1995.
- 367 [21] Q. Fang and D. A. Boas, “Monte carlo simulation of photon migration in 3d turbid media accelerated by graphics processing units,”  
368 *Optics express*, vol. 17, no. 22, pp. 20178–20190, 2009.
- 369 [22] S. Malektaji, I. T. Lima, and S. S. Sherif, “Monte carlo simulation of optical coherence tomography for turbid media with arbitrary  
370 spatial distributions,” *Journal of biomedical optics*, vol. 19, no. 4, p. 046001, 2014.
- 371 [23] Q. Fang and S. Yan, “Graphics processing unit-accelerated mesh-based monte carlo photon transport simulations,” *Journal of Biomedical  
372 Optics*, vol. 24, no. 11, p. 115002, 2019.
- 373 [24] S. L. Jacques, “Optical properties of biological tissues: a review,” *Physics in Medicine & Biology*, vol. 58, no. 11, p. R37, 2013.
- 374 [25] I. T. Lima, A. Kalra, H. E. Hernández-Figueroa, and S. S. Sherif, “Fast calculation of multipath diffusive reflectance in optical coherence  
375 tomography,” *Biomedical optics express*, vol. 3, no. 4, pp. 692–700, 2012.
- 376 [26] A. Bashkatov, E. Genina, V. Kochubey, and V. Tuchin, “Optical properties of human skin, subcutaneous and mucous tissues in the  
377 wavelength range from 400 to 2000 nm,” *Journal of Physics D: Applied Physics*, vol. 38, no. 15, p. 2543, 2005.
- 378 [27] A. N. Bashkatov, E. A. Genina, and V. V. Tuchin, “Optical properties of skin, subcutaneous, and muscle tissues: a review,” *Journal of  
379 Innovative Optical Health Sciences*, vol. 4, no. 01, pp. 9–38, 2011.
- 380 [28] A. N. Bashkatov, E. A. Genina, V. I. Kochubey, V. Rubtsov, E. A. Kolesnikova, and V. V. Tuchin, “Optical properties of human colon  
381 tissues in the 350–2500 nm spectral range,” *Quantum Electronics*, vol. 44, no. 8, p. 779, 2014.
- 382 [29] A. N. Bashkatov, K. V. Berezin, K. N. Dvoretzkiy, M. L. Chernavina, E. A. Genina, V. D. Genin, V. I. Kochubey, E. N. Lazareva,  
383 A. B. Pravdin, M. E. Shvachkina, *et al.*, “Measurement of tissue optical properties in the context of tissue optical clearing,” *Journal of  
384 biomedical optics*, vol. 23, no. 9, p. 091416, 2018.
- 385 [30] H. Si, “Tetgen, a delaunay-based quality tetrahedral mesh generator,” *ACM Transactions on Mathematical Software (TOMS)*, vol. 41,  
386 no. 2, p. 11, 2015.
- 387 [31] L. da Costa Campos, R. Hornung, G. Gompper, J. Elgeti, and S. Caspers, “The role of thickness inhomogeneities in hierarchical cortical  
388 folding,” *bioRxiv*, 2020.
- 389 [32] W. Kou, A. P. S. Bhalla, B. E. Griffith, J. E. Pandolfino, P. J. Kahrilas, and N. A. Patankar, “A fully resolved active musculo-mechanical  
390 model for esophageal transport,” *Journal of computational physics*, vol. 298, pp. 446–465, 2015.

- 391 [33] W. Kou, J. E. Pandolfino, P. J. Kahrilas, and N. A. Patankar, "Simulation studies of circular muscle contraction, longitudinal muscle  
392 shortening, and their coordination in esophageal transport," *American Journal of Physiology-Gastrointestinal and Liver Physiology*,  
393 vol. 309, no. 4, pp. G238–G247, 2015.
- 394 [34] P. R. Munro, A. Curatolo, and D. D. Sampson, "Full wave model of image formation in optical coherence tomography applicable to  
395 general samples," *Optics express*, vol. 23, no. 3, pp. 2541–2556, 2015.
- 396 [35] T. Brenner, P. R. Munro, B. Krüger, and A. Kienle, "Two-dimensional simulation of optical coherence tomography images," *Scientific*  
397 *reports*, vol. 9, no. 1, pp. 1–16, 2019.
- 398 [36] Y. Wang and L. Bai, "Accurate monte carlo simulation of frequency-domain optical coherence tomography," *International journal for*  
399 *numerical methods in biomedical engineering*, vol. 35, no. 4, p. e3177, 2019.
- 400 [37] Q. Fang, "Mesh-based monte carlo method using fast ray-tracing in plücker coordinates," *Biomedical optics express*, vol. 1, no. 1,  
401 pp. 165–175, 2010.
- 402 [38] E. Hannezo, J. Prost, and J.-F. Joanny, "Instabilities of monolayered epithelia: shape and structure of villi and crypts," *Physical Review*  
403 *Letters*, vol. 107, no. 7, p. 078104, 2011.

## VII. SUPPLEMENTARY INFORMATION

TABLE II

(SUPPLEMENT) GLOSSARY OF TERMS EXTRACTED FROM PATHOLOGY REPORTS AND THEIR CORRESPONDENCE TO REDUCED LABELS INDICATING THE UNDERLYING MICROANATOMY AND DISEASE STAGE. THE FINAL LABEL DESCRIBES THE ANNOTATION IN THE ABSENCE OF ANY OTHER INDICATION.

| Keyword                             | Abbrv.         | Label                 |
|-------------------------------------|----------------|-----------------------|
| esophagitis                         | ESGTS          | STRATIFIED EPITHELIUM |
| inflammation                        | INF            | STRATIFIED EPITHELIUM |
| reflux esophagitis                  | RFLX_ESGTS     | STRATIFIED EPITHELIUM |
| reactive features                   | R              | STRATIFIED EPITHELIUM |
| intraepithelial eosinophil          | INTR_EOSIN     | STRATIFIED EPITHELIUM |
| increased eosinophils               | INCR_EOSIN     | STRATIFIED EPITHELIUM |
| squamous mucosa                     | SQ_MUCOSA      | STRATIFIED EPITHELIUM |
| mild reactive features              | M_R            | STRATIFIED EPITHELIUM |
| reflux                              | RFLX_INDICATED | STRATIFIED EPITHELIUM |
| columnar epithelium                 | COLE           | METAPLASIA            |
| consistent with Barrett's esophagus | BE             | METAPLASIA            |
| rare goblet cells                   | RGC            | METAPLASIA            |
| goblet cells                        | GC             | METAPLASIA            |
| positive for intestinal metaplasia  | IM             | METAPLASIA            |
| squamocolumnar mucosa               | SCOLE          | METAPLASIA            |
| reflux carditis                     | RFLX_CDTS      | STOMACH               |
| cardia-type mucosa                  | CM             | STOMACH               |
| gastric cardia-type mucosa          | CM             | STOMACH               |
| cardiac-type mucosa                 | CM             | STOMACH               |
| carido-oxtyntic-type mucosa         | COM            | STOMACH               |
| gastric cardio-oxtyntic mucosa      | COM            | STOMACH               |
| gastric oxyntic-type mucosa         | COM            | STOMACH               |
| gastric oxyntic mucosa              | COM            | STOMACH               |
| cardio-fundic type mucosa           | CFM            | STOMACH               |
| fundic-type mucosa                  | FM             | STOMACH               |
| low-grade dysplasia                 | LGD            | DYSPLASIA             |
| high-grade dysplasia                | HGD            | DYSPLASIA             |
| intramucosal adenocarcinoma         | IMC            | CANCER                |
| adenocarcinoma                      | AC             | CANCER                |
| high-grade squamous dysplasia       | SHGD           | OTHER                 |
| low-grade squamous dysplasia        | SLGD           | OTHER                 |

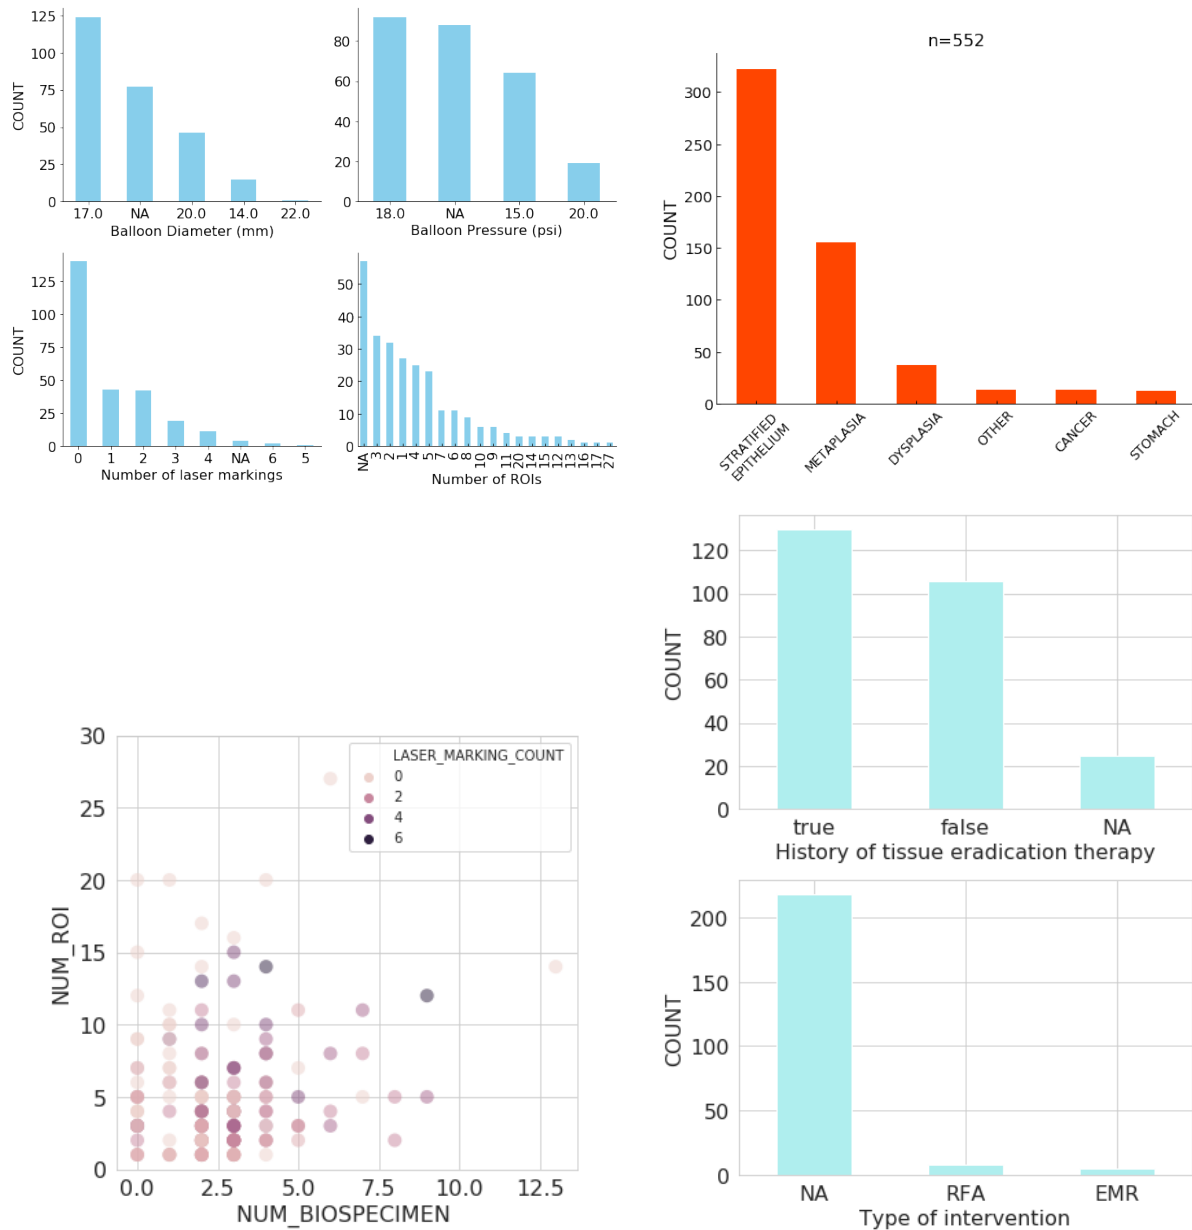

Fig. 3. (SUPPLEMENT) **Examples of missingness and heterogeneity in the imaging and pathology datasets:** (top left: A) The number of ROIs and laser-marked regions vary among scans. Different balloon catheter diameters and pressures had been used during the period of data collection. (top right: B) Annotated biospecimens were skewed toward controls (stratified epithelium = NORMAL). (bottom left: C) Tissue sampling is guided by the endoscopist's on-the-fly assessment of the risk of progression, and the extent of *ex vivo* confirmation needed on a patient-by-patient basis. (bottom right: D) Patients present at different stages of diagnosis and treatment, some for follow-up after interventions like tissue eradication therapy, and different treatments vary in terms of their impact on existing tissue; e.g. radiofrequency ablation (RFA) may remove large segments of the epithelium while endoscopic mucosal resection (EMR) is a localized intervention.
